# Supplementary material
Source: publisher figshare collection journal article supplement (https://sage.figshare.com/ndownloader/files/22882127)
Supplement: Supplementary file 1 [file 22882127]

## Appendix: Word/ Sentence list for production experiment

| Consonant | Phonetic environment | Example sentence ( <b>Target word</b> )                                                                                                                                                                                                                                                                                                            |
|-----------|----------------------|----------------------------------------------------------------------------------------------------------------------------------------------------------------------------------------------------------------------------------------------------------------------------------------------------------------------------------------------------|
| /f/       | <b><u>VC</u></b>     | Switch <b><u>off</u></b> the lights.                                                                                                                                                                                                                                                                                                               |
|           | <b><u>CV</u></b>     | The house was too <b><u>far</u><sup>1</sup></b> away.<br>She bought herself a <b><u>fur</u><sup>1</sup></b> jacket.<br>I had to pay a legal <b><u>fee</u></b> of \$300.<br>James is his <b><u>foe</u></b> not friend.<br>He had <b><u>four</u><sup>1</sup></b> cups of coffee.                                                                     |
|           | <b><u>CVC</u></b>    | I want to <b><u>surf</u><sup>1</sup></b> in Bali.<br>The <b><u>chef</u></b> is my brother.<br>I had a <b><u>beef</u></b> sandwich.<br>I buy a <b><u>loaf</u></b> of bread every week.<br>The <b><u>roof</u></b> was leaking.<br>John had a good <b><u>laugh</u></b> with his friends.<br>The doctor prescribed me <b><u>cough</u></b> syrup.       |
|           | <b><u>CVC</u></b>    | It was the smelliest <b><u>fart</u><sup>1</sup></b> in the world.<br>She has a <b><u>firm</u><sup>1</sup></b> handshake.<br>The sale on the air <b><u>fares</u><sup>1</sup></b> have ended.<br>The baby's <b><u>feet</u></b> were cute and tiny.<br>He made a <b><u>fool</u></b> of himself.<br>She <b><u>fought</u></b> with her sister everyday. |
|           | <b><u>CVCC</u></b>   | Please help <b><u>fold</u></b> the laundry.<br>He built a <b><u>fence</u></b> around his house.                                                                                                                                                                                                                                                    |

---

<sup>1</sup> We take Singapore English to be non-rhotic, and therefore assume the absence of the postvocalic-*r*.

| Consonant | Phonetic environment | Example sentence ( <b><u>Target word</u></b> )                                                                                                                                                                                                                                                                                                                                                                                 |
|-----------|----------------------|--------------------------------------------------------------------------------------------------------------------------------------------------------------------------------------------------------------------------------------------------------------------------------------------------------------------------------------------------------------------------------------------------------------------------------|
| /t/       | <b><u>VC</u></b>     | <p>I went to an <b><u>art</u></b><sup>1</sup> exhibition.</p> <p>We <b><u>ate</u></b> dinner in a noisy cafe.</p> <p>I love to <b><u>eat</u></b> local dishes.</p> <p>Buy some <b><u>oat</u></b> biscuits.</p> <p>She really <b><u>ought</u></b> to apologize.</p>                                                                                                                                                             |
|           | <b><u>CV</u></b>     | <p>We use <b><u>tar</u></b><sup>1</sup> to cover the roads.</p> <p>We should get some <b><u>tea</u></b> this afternoon.</p> <p>My big <b><u>toe</u></b> is infected.</p> <p>They have <b><u>two</u></b> children.</p> <p>She <b><u>tore</u></b><sup>1</sup> up the letter in anger.</p> <p>There was a <b><u>tear</u></b><sup>1</sup> on his pants.</p>                                                                        |
|           | <b><u>CVC</u></b>    | <p>The dress was only <b><u>ten</u></b> dollars.</p> <p>She made a fruit <b><u>tart</u></b><sup>1</sup> for me.</p> <p>I was <b><u>turn</u></b><sup>1</sup> between buying the two jackets.</p> <p>Please <b><u>turn</u></b><sup>1</sup> left in 1 kilometre.</p> <p>Mary mentioned that <b><u>teal</u></b> was her favorite color.</p> <p>Her <b><u>tone</u></b> was friendly.</p> <p>The <b><u>tool</u></b> box was old.</p> |
|           | <b><u>CVC</u></b>    | <p>His <b><u>shirt</u></b><sup>1</sup> was blue.</p> <p>His <b><u>net</u></b> worth is 1 billion dollars.</p> <p>The old <b><u>cart</u></b><sup>1</sup> broke.</p> <p>Tie a <b><u>knot</u></b> at the end of the string.</p> <p>He has a very <b><u>neat</u></b> bedroom.</p> <p>The <b><u>boat</u></b> is big.</p> <p>He made a <b><u>moot</u></b> point.</p>                                                                 |

| Consonant | Phonetic environment | Example sentence ( <b>Target word</b> )                                                                                                                                                |
|-----------|----------------------|----------------------------------------------------------------------------------------------------------------------------------------------------------------------------------------|
| /θ/       | <u>CV</u>            | He has to <b>thaw</b> the chicken.<br>He could not walk due to his <b>thigh</b> injury.                                                                                                |
|           | <u>CCVC</u>          | The <b>sloth</b> is very dirty.                                                                                                                                                        |
|           | <u>CVC</u>           | The <b>path</b> continues for half a kilometre.<br>She gave <b>birth</b> <sup>1</sup> yesterday.<br>I got my <b>teeth</b> pulled out.<br>They <b>loathe</b> <sup>2</sup> those people. |
|           |                      | Her <b>tooth</b> was shaky.                                                                                                                                                            |
|           | <u>VC</u>            | The <b>Earth</b> <sup>1</sup> is heavily polluted.<br>He took an <b>oath</b> never to cheat.                                                                                           |
|           | <u>CVCC</u>          | I would like <b>thank</b> my family for their support.                                                                                                                                 |
|           | <u>CVC</u>           | She came in <b>third</b> <sup>1</sup> in class.<br>The <b>thief</b> was jailed.<br>I <b>thought</b> she wanted the sweater.                                                            |
|           |                      |                                                                                                                                                                                        |
| /v/       | <u>VC</u>            | I spent New Year's <b>eve</b> with my family.                                                                                                                                          |
|           | <u>CV</u>            | Jane took a <b>vow</b> not to smoke.                                                                                                                                                   |
|           | <u>CCV</u>           | The <b>view</b> from the lodge is beautiful.                                                                                                                                           |
|           | <u>CVC</u>           | My favorite <b>vet</b> is my friend.<br>Everyone has to <b>vote</b> next year.<br>Please <b>void</b> this contract.                                                                    |
|           | <u>CVC</u>           | I <b>love</b> watching movies.                                                                                                                                                         |
|           | <u>CCVC</u>          | He <b>drove</b> throughout the night.<br>You need to <b>prove</b> your point.                                                                                                          |
|           |                      |                                                                                                                                                                                        |

<sup>2</sup> We note the word 'loathe' ends with /ð/ in most standard accounts of British and American English. However, our auditory and acoustic analyses of the word pronounced by our participants consistently showed that 'loathe' was produced with a voiceless [θ] or [t], and never with [ð] or [d]. We suggest that the pronunciation of 'loathe' using [ð] may be a regional variant, a possibility that could be investigated systematically in future research. We include 'loathe' in the /θ/ category, here, to reflect the pronunciation patterns of our Singaporean participants.

| Consonant        | Phonetic environment                              | Example sentence ( <b><u>Target word</u></b> )                                                                                                                                                                                                                                                                                                                                                                                                                                                                                                                  |
|------------------|---------------------------------------------------|-----------------------------------------------------------------------------------------------------------------------------------------------------------------------------------------------------------------------------------------------------------------------------------------------------------------------------------------------------------------------------------------------------------------------------------------------------------------------------------------------------------------------------------------------------------------|
| /w/              | <b><u>C</u></b> V                                 | She has a <b><u>wee</u></b> little girl.<br>The <b><u>war</u></b> <sup>1</sup> ended recently.<br>Please <b><u>wear</u></b> <sup>1</sup> the dress.                                                                                                                                                                                                                                                                                                                                                                                                             |
|                  | <b><u>C</u></b> V <b><u>C</u></b>                 | Bryan went through financial <b><u>woes</u></b> last year.<br>I went on a nice <b><u>walk</u></b> yesterday.<br>I start <b><u>work</u></b> <sup>1</sup> on Monday.<br>The <b><u>wise</u></b> old woman scolded Peter.<br>I <b><u>wish</u></b> I could be a singer.<br>I <b><u>woke</u></b> up from my nightmare.<br>You can find ply <b><u>wood</u></b> anywhere.<br>He <b><u>wooded</u></b> her with charming quotes.                                                                                                                                          |
|                  | <b><u>C</u></b> V <b><u>C</u></b> <b><u>C</u></b> | We had to head <b><u>west</u></b> to find the stall.                                                                                                                                                                                                                                                                                                                                                                                                                                                                                                            |
| Filler sentences | NIL                                               | I am reading a list of sentences.<br>He has some books.<br>He is carrying a ladder.<br>It is not perfect.<br>Stop and turn left.<br>She is eating a bowl of cereal.<br>This is my greatest fear.<br>My father loves to listen to the radio.<br>Those pants look great!<br>Have you read the news today?<br>She did not apologize.<br>Do not stare at the sun.<br>The painting is beautiful.<br>I was glued to the show.<br>I hate spiders.<br>Do not ask me any questions.<br>I love chocolates.<br>The cow died from illness.<br>He put the dough in the oven. |
